# Supplementary material for: Changes in tumour vessel density upon treatment with anti-angiogenic agents: relationship with response and resistance to therapy
Source: PubMed Central journal article supplement — Br J Cancer. 2013 Aug 6;109(5):1230–42. doi: 10.1038/bjc.2013.429 (PMC3778288; doi:10.1038/bjc.2013.429), 2013-08-06
Supplement: bjc2013429x1.pdf [file bjc2013429x1.pdf]

# Supplementary Figure 1

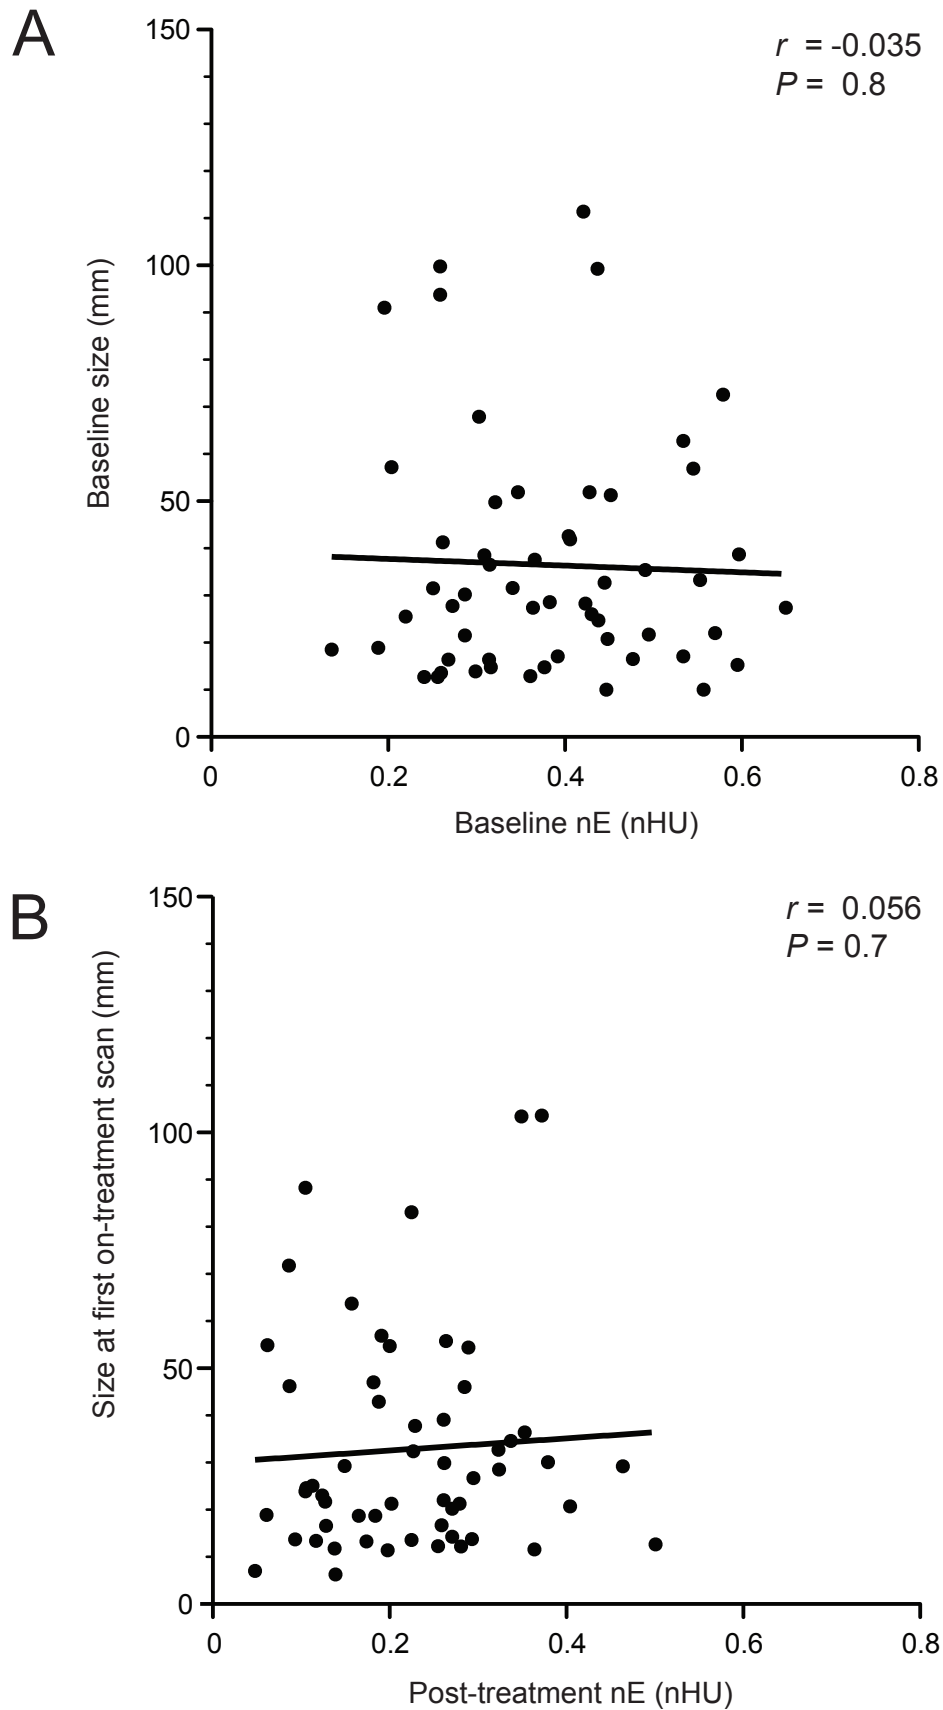

## Supplementary Figure 1 Analysis of correlation between baseline size and baseline enhancement or post-treatment size and post-treatment enhancement

**A.** Analysis of correlation between baseline size (mm) and baseline nE (nHU) ( $r = -0.035$ ,  $P = 0.8$ ). **B.** Analysis of correlation between post-treatment size and post-treatment nE (nHU) ( $r = 0.056$ ,  $P = 0.7$ ).

# Supplementary Figure 2

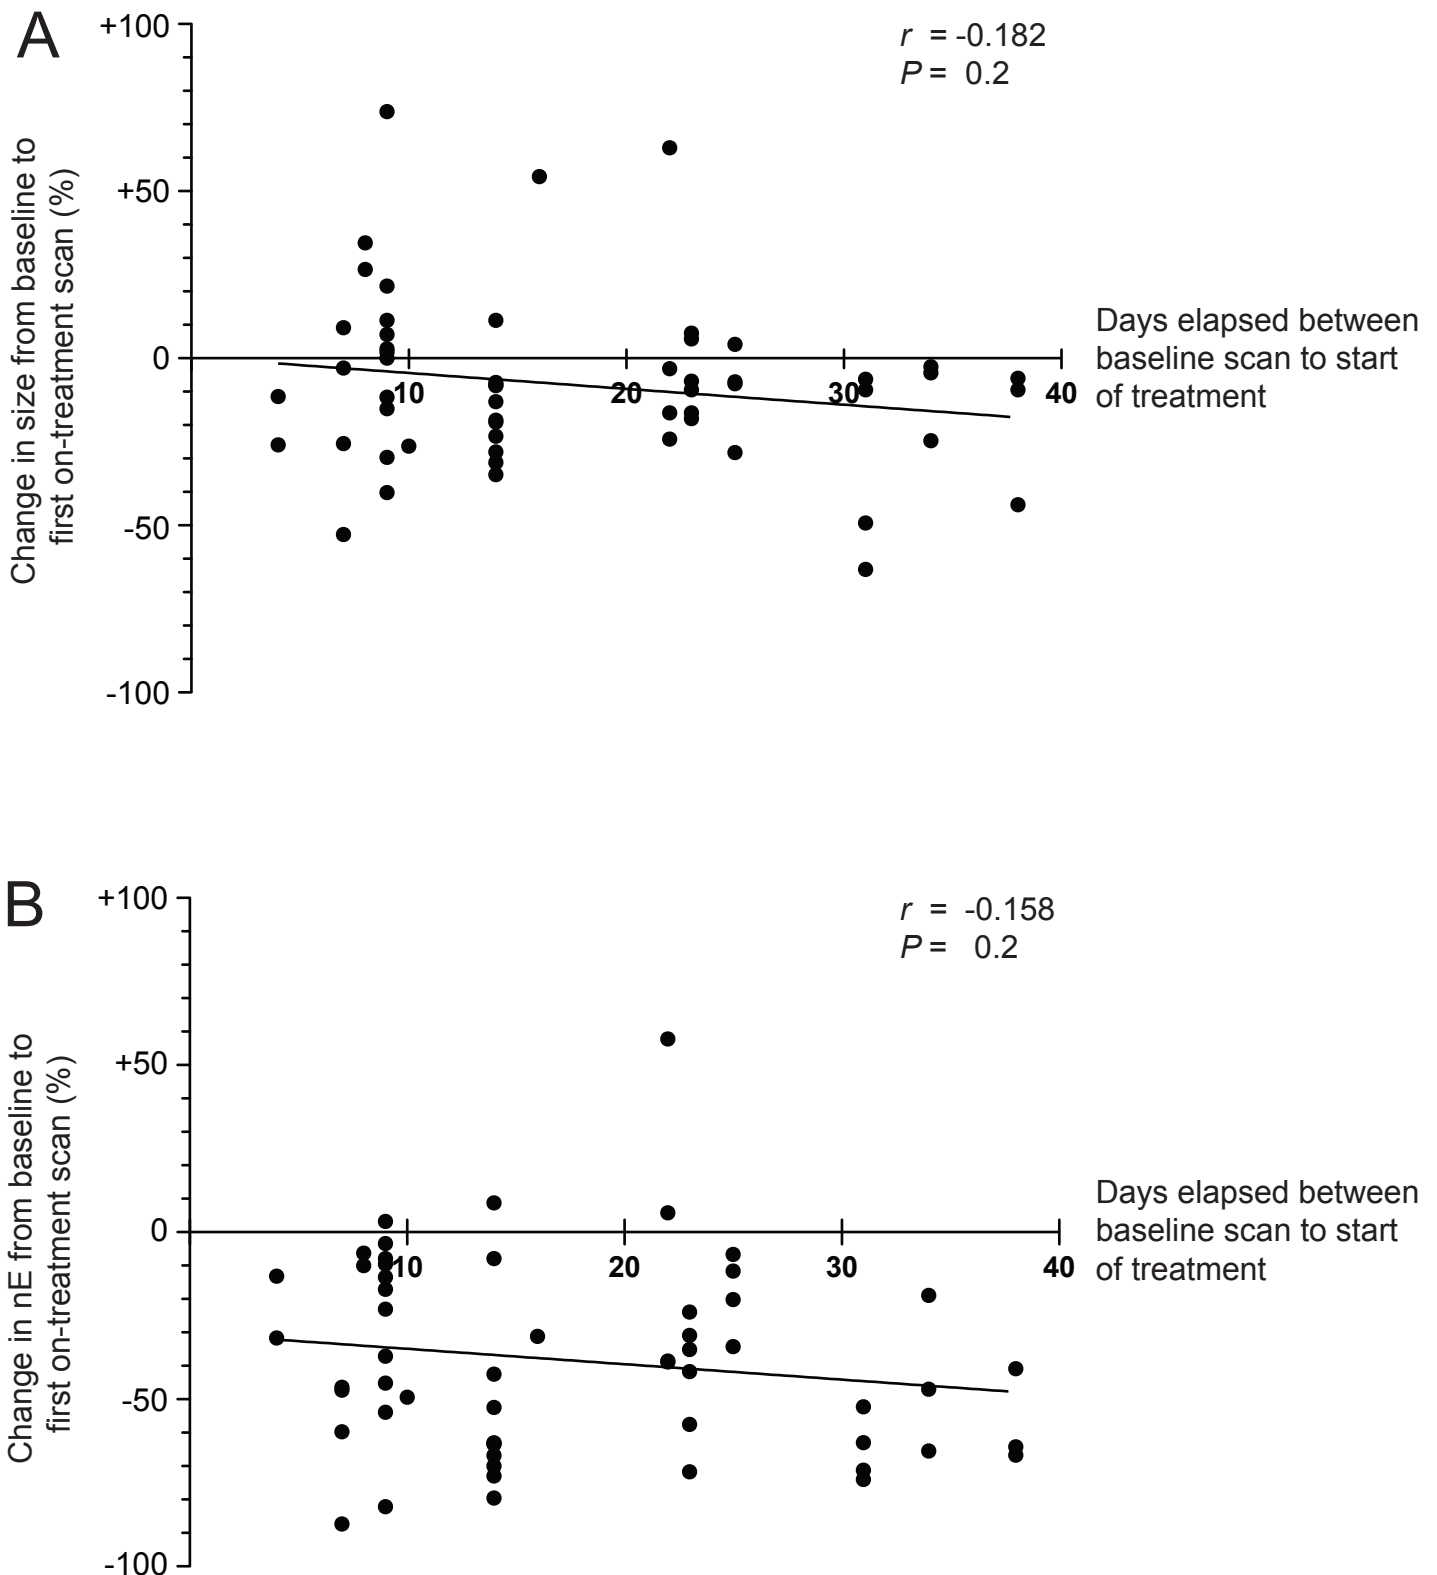

## Supplementary Figure 2 Analysis of correlation between change in size or change in enhancement (baseline scan to first on-treatment scan) and time elapsed (baseline scan to start of treatment)

**A.** Analysis of correlation between percentage change in lesion size (baseline scan to first on-treatment scan) and the duration of time elapsed (baseline scan to start of treatment) ( $r = -0.035$ ,  $P = 0.2$ )

**B.** Analysis of correlation between percentage change in nE (baseline scan to first on-treatment scan) and the duration of time elapsed (baseline scan to start of treatment) ( $r = -0.158$ ,  $P = 0.2$ ).

# Supplementary Figure 3

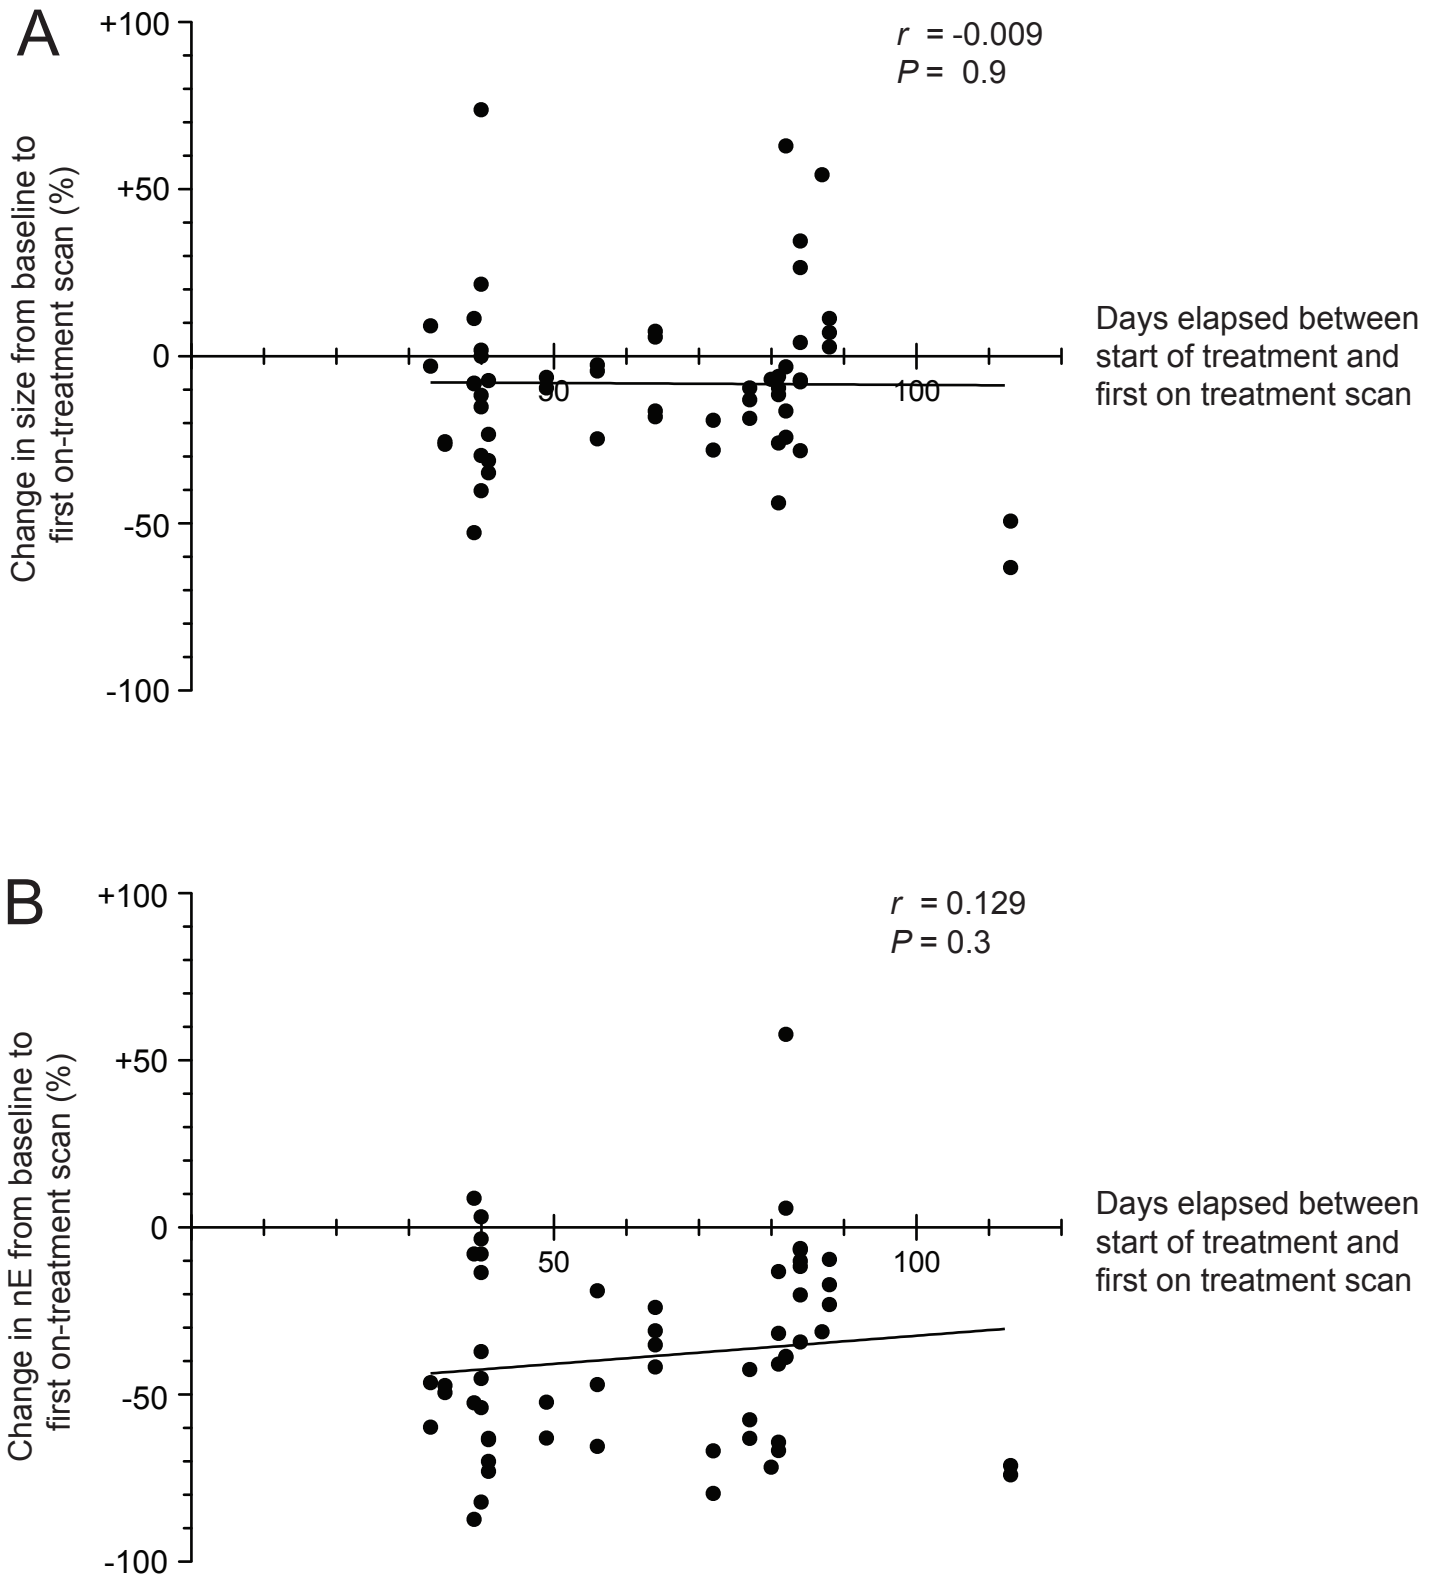

## Supplementary Figure 3 Analysis of correlation between change in size or change in enhancement (baseline scan to first on-treatment scan) and time elapsed (start of treatment to first on-treatment scan)

**A.** Analysis of correlation between percentage change in lesion size (baseline scan to first on-treatment scan) and the duration of time elapsed (start of treatment to first on-treatment scan) ( $r = -0.009$ ,  $P = 0.9$ ).

**B.** Analysis of correlation between percentage change in nE (baseline scan to first on-treatment scan) and the duration of time elapsed (start of treatment to first on-treatment scan) ( $r = 0.129$ ,  $P = 0.3$ ).

# Supplementary Figure 4

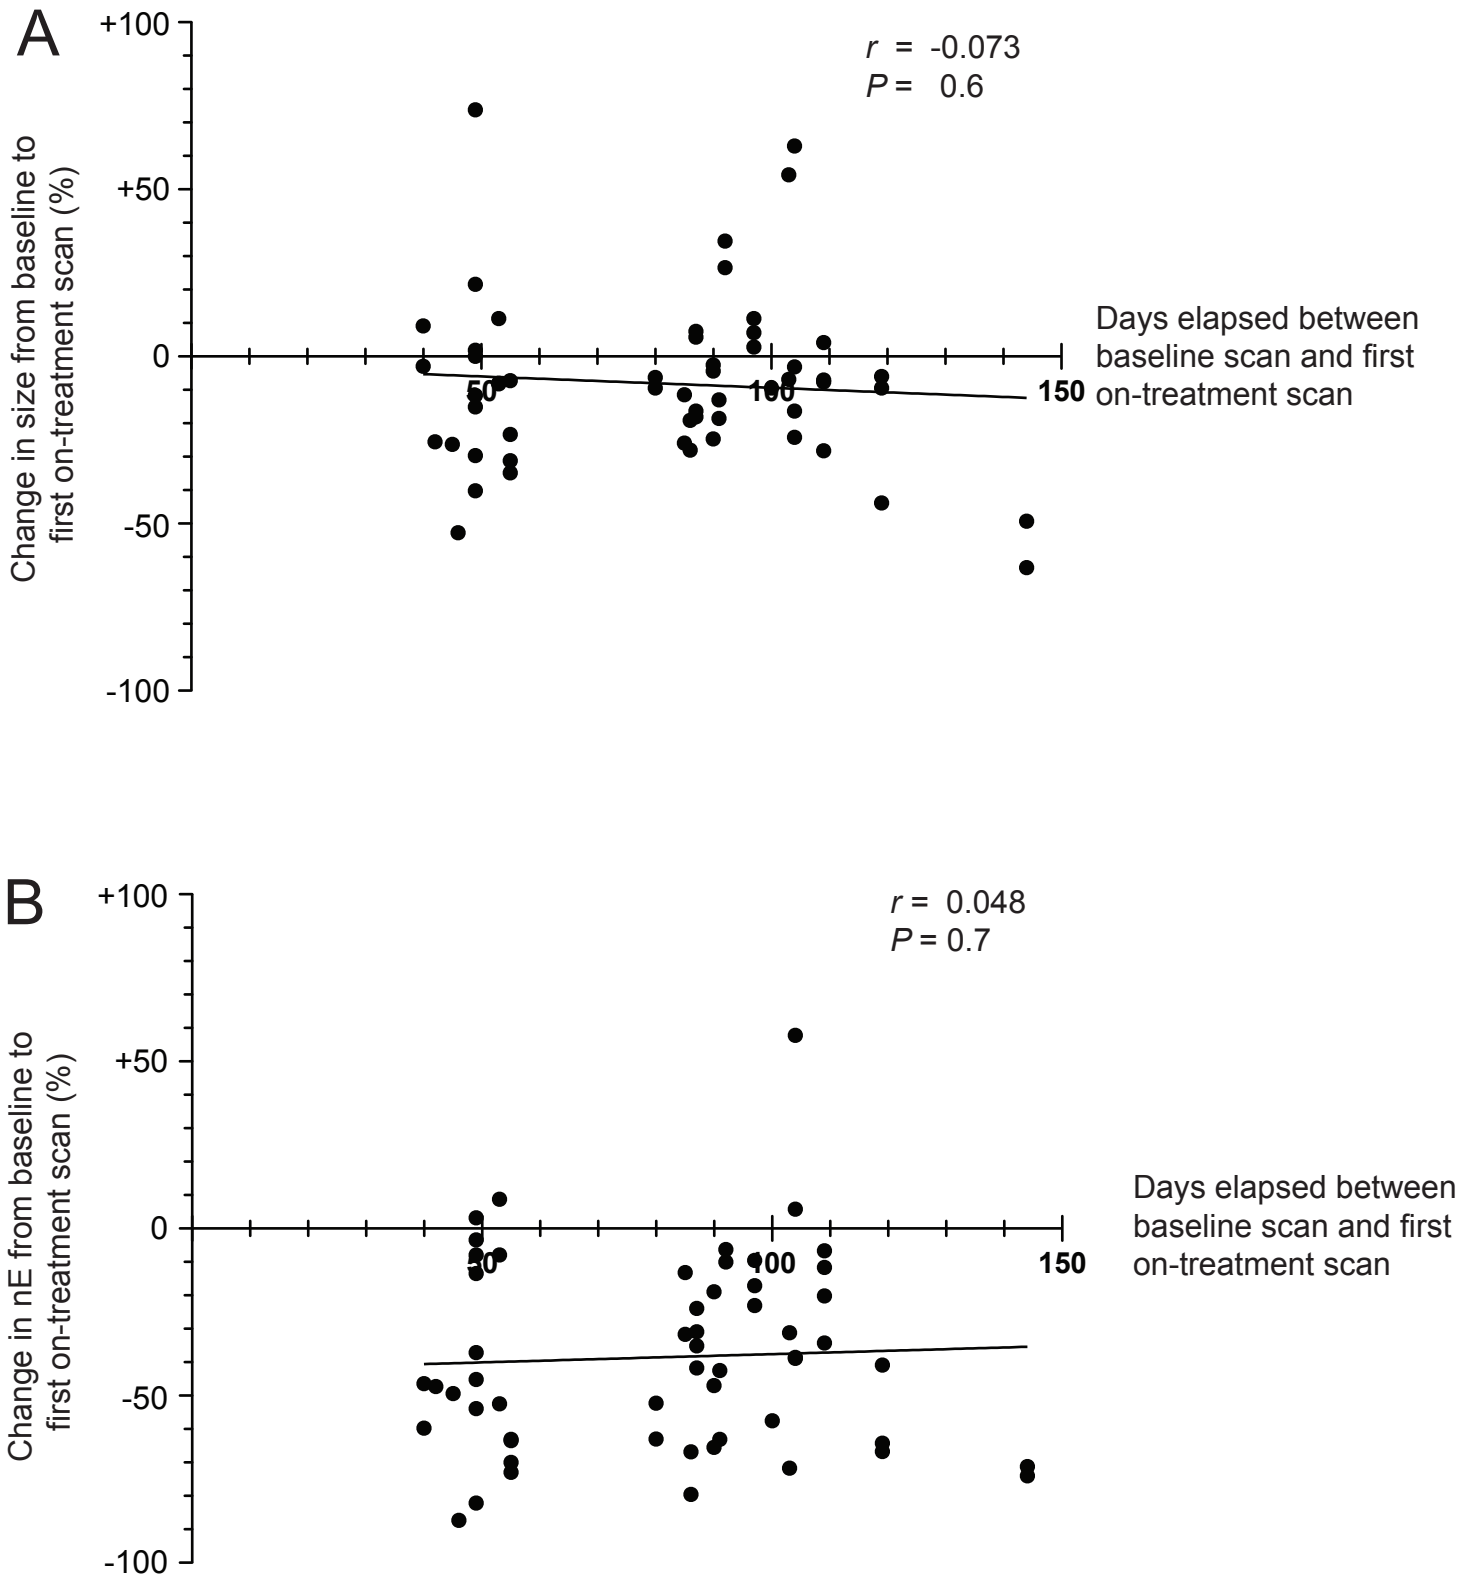

## Supplementary Figure 4 Analysis of correlation between change in size or change in enhancement (baseline scan to first on-treatment scan) and time elapsed (baseline scan to first on-treatment scan)

**A.** Analysis of correlation between percentage change in lesion size (baseline scan to first on-treatment scan) and the duration of time elapsed (baseline scan to first on-treatment scan) ( $r = -0.073$ ,  $P = 0.6$ )

**B.** Analysis of correlation between percentage change in nE (baseline scan to first on-treatment scan) and the duration of time elapsed (baseline scan to first on-treatment scan) ( $r = 0.048$ ,  $P = 0.7$ ).

# Supplementary Figure 5

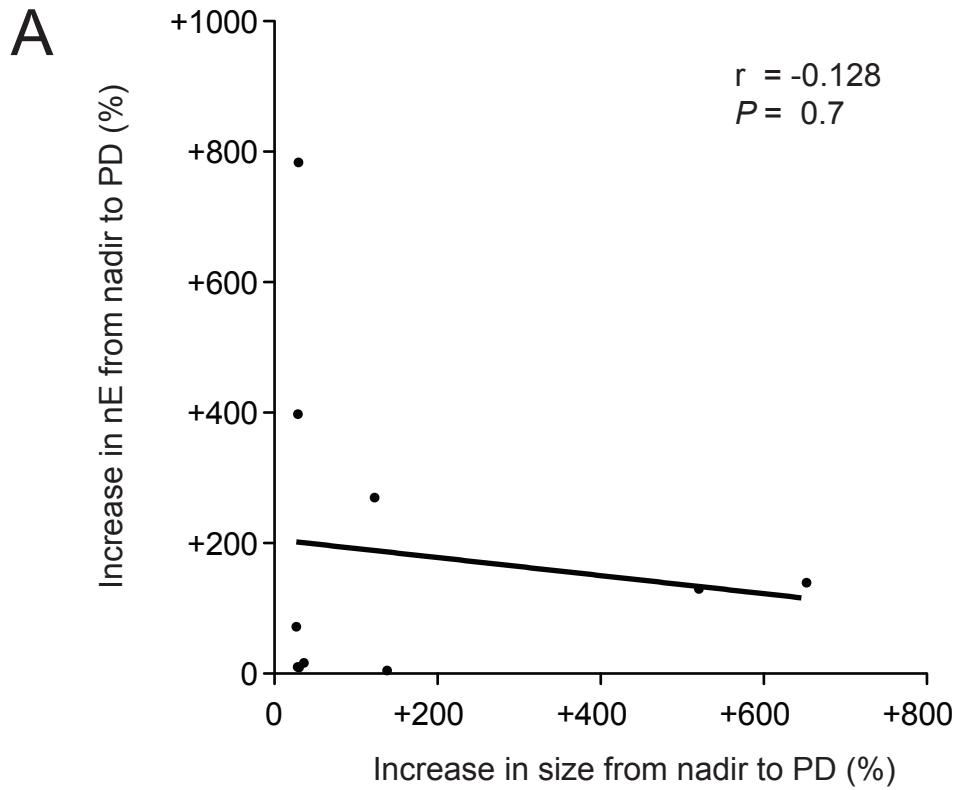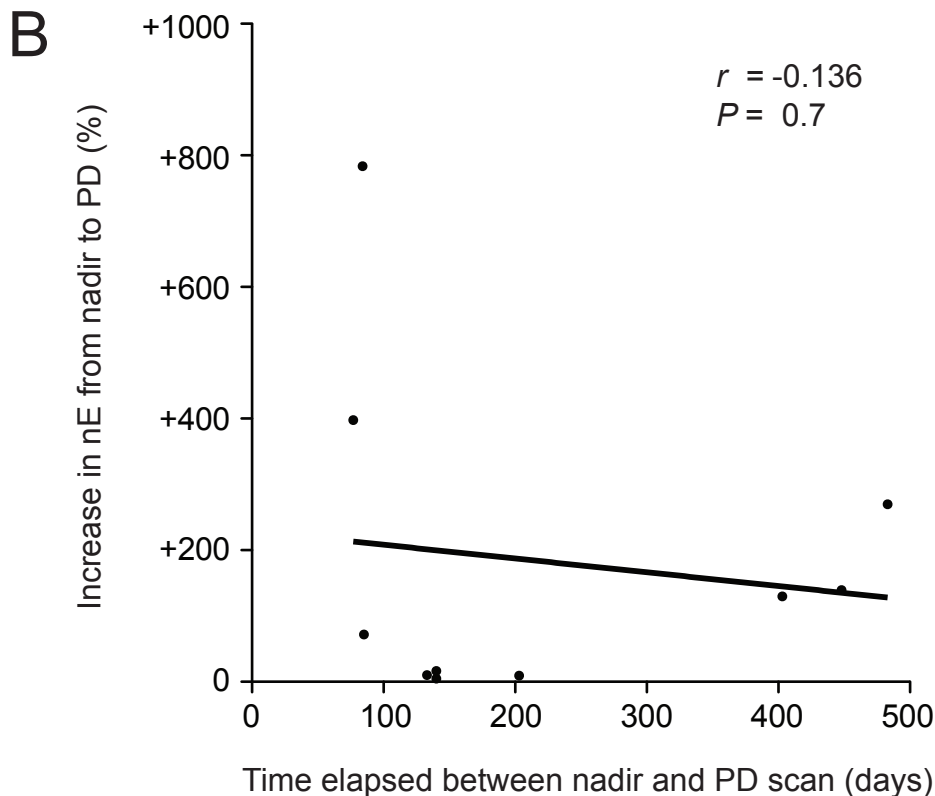

## Supplementary Figure 5 Analysis of correlation between change in enhancement (nadir to PD) and change in size or days elapsed between scans

**A.** Analysis of correlation between increase in nE (nadir to PD) and increase in size (nadir to PD) ( $r = -0.128$ ,  $P = 0.723$ ). **B.** Analysis of correlation between increase in nE (nadir to PD) and the duration of time elapsed between scans (nadir to PD) ( $r = -0.136$ ,  $P = 0.708$ ). Only the 10 lesions that could be followed until disease progression were included in the analysis.
